# Supplementary material for: Fibroblast Nox2 (NADPH Oxidase-2) Regulates ANG II (Angiotensin II)–Induced Vascular Remodeling and Hypertension via Paracrine Signaling to Vascular Smooth Muscle Cells
Source: PubMed Central journal article supplement (PMC7837692; doi:10.1161/atvbaha.120.315322), 2020-10-15
Supplement: atv-41-698-s001.pdf [file atv-41-698-s001.pdf]

## SUPPLEMENTAL MATERIALS

### **Fibroblast Nox2 regulates angiotensin II-induced vascular remodeling and hypertension via paracrine signaling to vascular smooth muscle cells**

Craig B. Harrison PhD<sup>1</sup>, Silvia Cellone Trevelin PhD<sup>1</sup>, Daniel A. Richards PhD<sup>1</sup>, Celio X.C. Santos PhD<sup>1</sup>, Greta Sawyer PhD<sup>1</sup>, Andrea Markovinic PhD<sup>2</sup>, Xiaohong Zhang MD<sup>1</sup>, Min Zhang MD, PhD<sup>1</sup>, Alison C. Brewer PhD<sup>1</sup>, Xiaoke Yin PhD<sup>1</sup>, Manuel Mayr MD PhD<sup>1</sup>, Ajay M. Shah MD<sup>1</sup>, FMedSci.

<sup>1</sup>King's College London British Heart Foundation Centre of Excellence, School of Cardiovascular Medicine and Sciences, London, United Kingdom. <sup>2</sup>King's College London, Department of Basic and Clinical Neuroscience, Maurice Wohl Clinical Neuroscience Institute, London, United Kingdom.

**Correspondence to:** Professor Ajay M Shah, King's College London BHF Centre of Excellence, James Black Centre, 125 Coldharbour Lane, London SE5 9NU, UK  
Tel: 44-2078485189; Fax: 44-2078485193; Email: [ajay.shah@kcl.ac.uk](mailto:ajay.shah@kcl.ac.uk)

## **Contents**

Supplemental Figure I. mRNA expression levels of Nox2 regulatory subunits and Nox isoforms in Fibro-Nox2KO and control Nox2Flox aorta.

Supplemental Figure II. Fibroblast-specific targeting of Nox2.

Supplemental Figure III. Effect of fibroblast-specific Nox2 deletion on ROS levels.

Supplemental Figure IV. Effect of fibroblast-specific Nox2 deletion on renal function.

Supplemental Figure V. Nox2 protein levels in subfornical organ of the Fibro-Nox2KO mouse brain.

Supplemental Figure VI. Effect of conditioned medium of aortic fibroblasts stimulated with ANG II on DNA synthesis of VSMC.

Supplemental Figure VII. Effect of catalase treatment of fibroblast-conditioned medium.

Supplemental Figure VIII. Proteomic analyses of the conditioned medium of primary cardiac fibroblasts.

Supplemental Figure IX. Proteomic analyses of the conditioned medium of cardiac fibroblasts.

Supplemental Figure X. Effect of ANG II on mRNA expression of putative fibroblast growth factors.

Supplemental Figure XI. HTRA1 protein levels in fibroblast-conditioned medium.

Supplemental Figure XII. ELISA for TGF $\beta$  in fibroblast-conditioned medium.

Source immunoblots

Major Resources Table

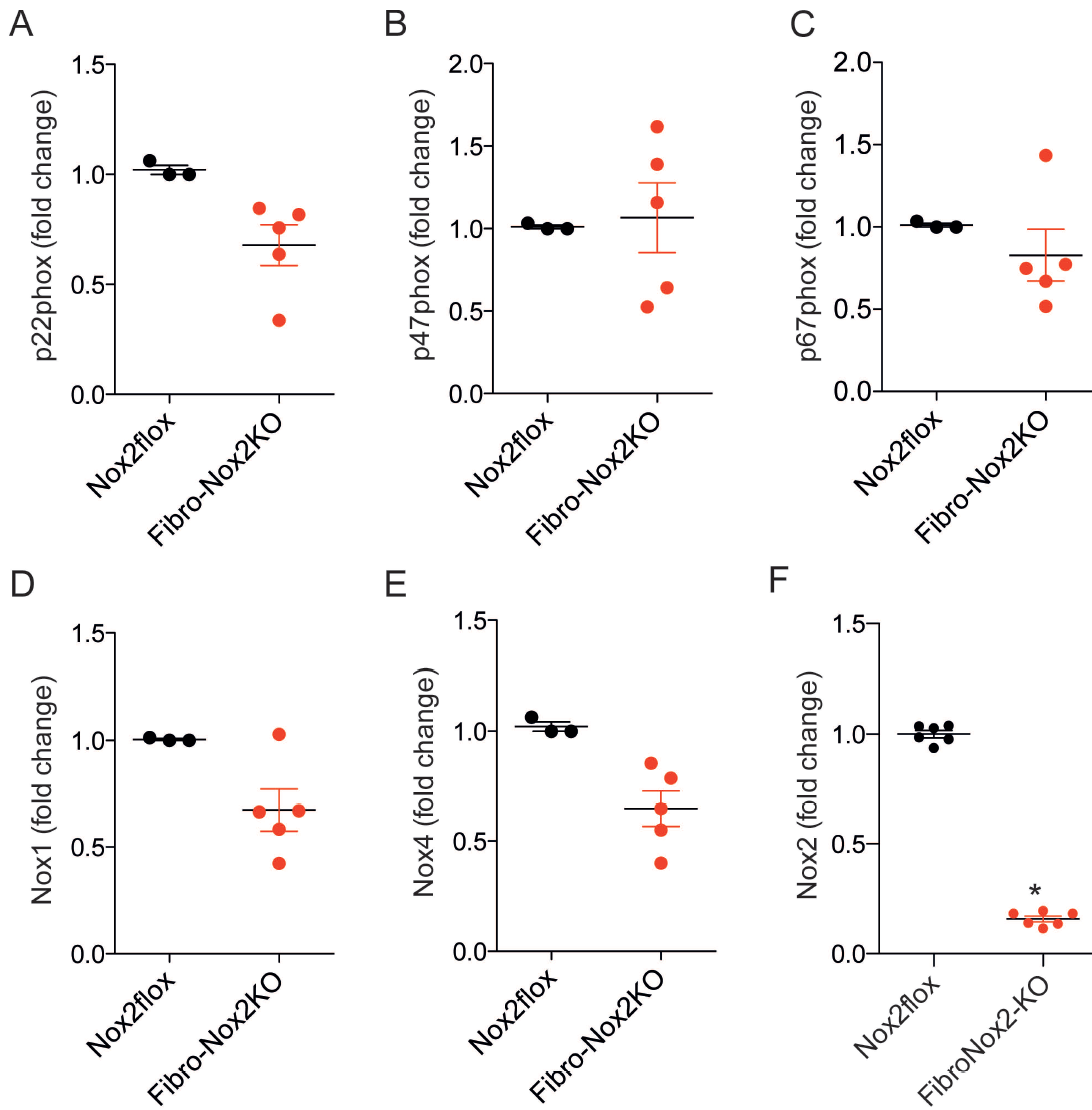

**Supplemental Fig. I. mRNA expression levels of Nox2 regulatory subunits and Nox isoforms in Fibro-Nox2KO and control Nox2Flox aorta. n=3-6/group. \*P<0.05, unpaired Student's t-test.**

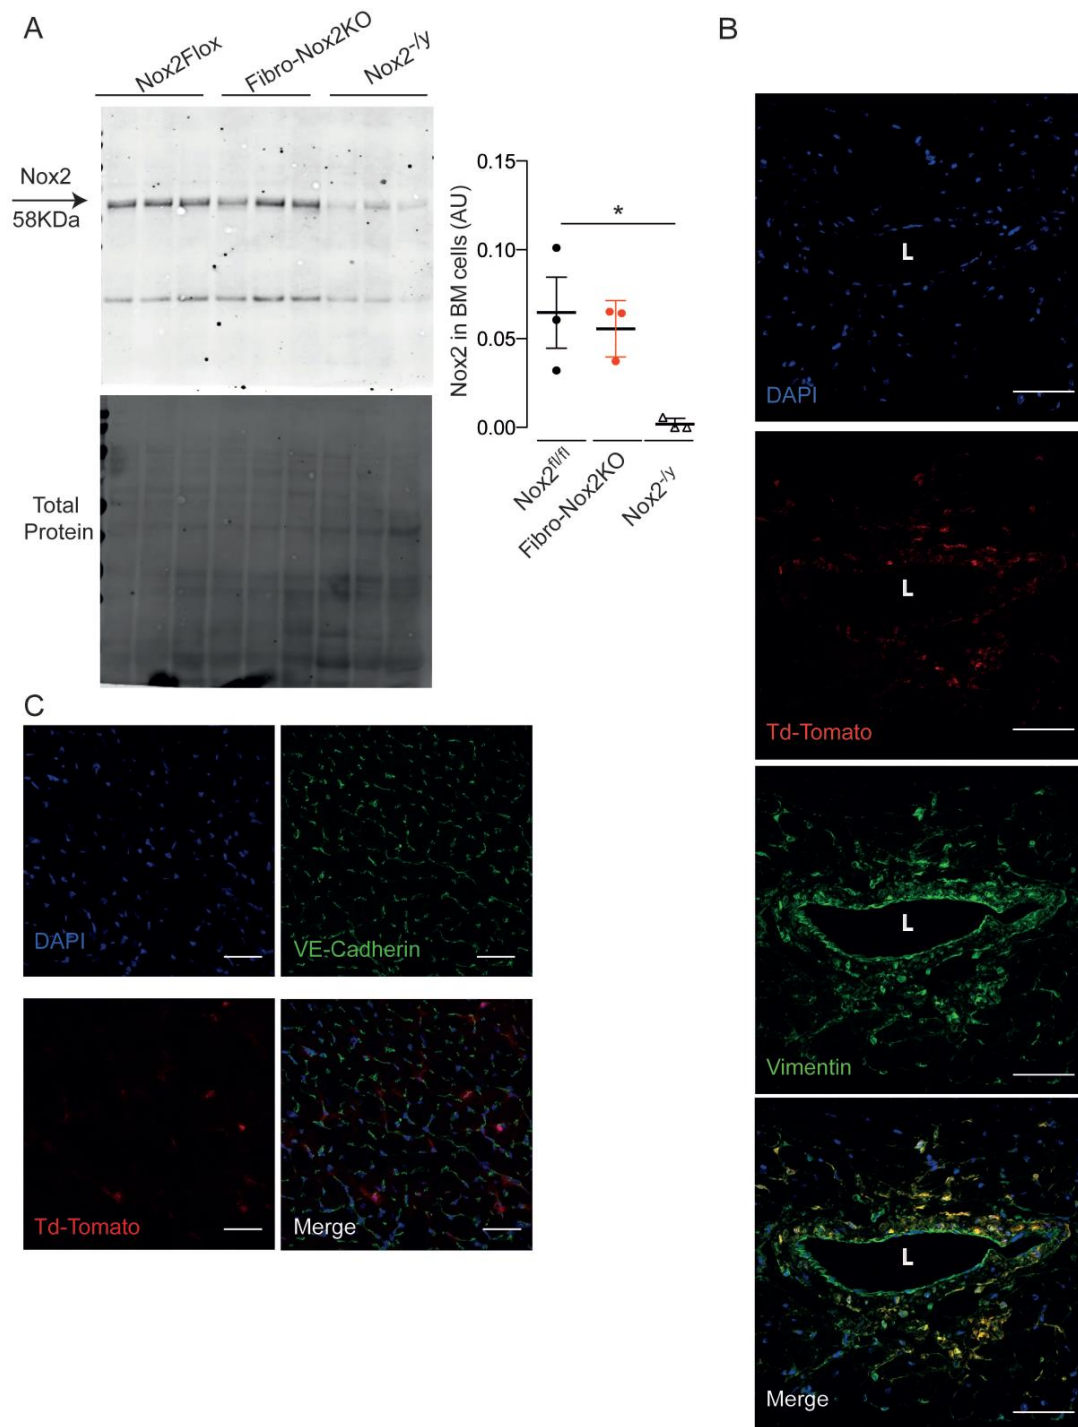

**Supplemental Fig. II. Fibroblast-specific targeting of Nox2.** (A) Nox2 protein levels are unaltered in bone marrow cells of FibroNox2KO mice by immunoblotting. The levels of Nox2 were normalized by total protein. AU, arbitrary units. n=3 per group. \*P<0.05; Kruskal-Wallis followed by Dunn's post-test. (B) Coronary vessel in myocardial section of *Col1a2CreER:ROSA26R-tdTomato<sup>fl/fl</sup>* mice. Green, vimentin; Red, Td-Tomato; Blue, DAPI; L, lumen. Td-Tomato overlaps with vimentin in the adventitia but not at the endothelium. (C) Myocardial sections stained for EC with anti-VE-Cadherin Ab (green). Red, Td-Tomato; Blue, DAPI. There is no overlap between Td-Tomato and VE-cadherin. Scale bars, 50  $\mu$ m.

A

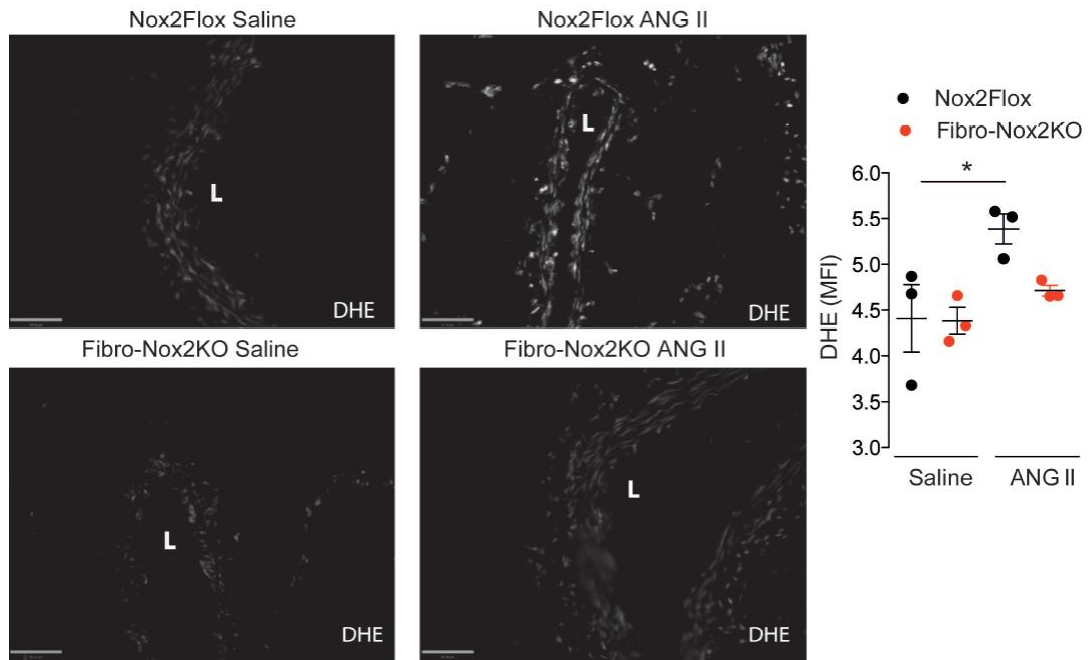

B

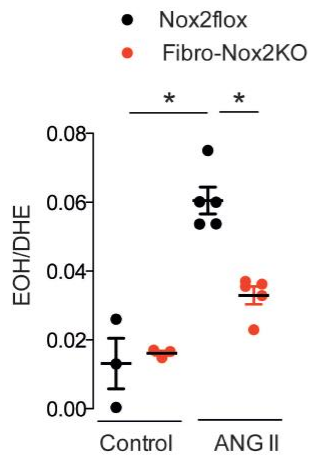

C

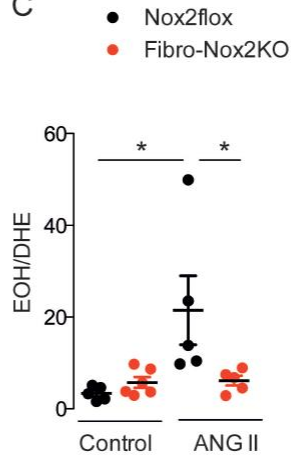

**Supplemental Fig. III. Effect of fibroblast-specific Nox2 deletion on ROS levels.** (A) Dihydroethidium (DHE) fluorescence as an index of ROS levels in aorta of Fibro-Nox2KO and Nox2Flox mice after 14 days of ANG II or saline infusion. Representative images are shown to the left and mean data to the right (n=3/group). L, lumen; MFI, mean fluorescence intensity. Scale bars, 50 $\mu$ m. (B) Levels of DHE oxidation product 2-hydroxyethidine (EOH) expressed as a ratio of the DHE consumed, and normalized by aortic segment size. EOH and DHE were quantified by HPLC using area under curve. Aortic segments were obtained from Fibro-Nox2KO or Nox2flox control mice infused with ANG II or saline. (C) EOH levels quantified as in B, using fibroblasts stimulated with ANG II. n=3-6 per group for B and C. \*P<0.05; Kruskal-Wallis followed by Dunn's post-test (A) and One-way ANOVA followed by Tukey post-test (B, C).

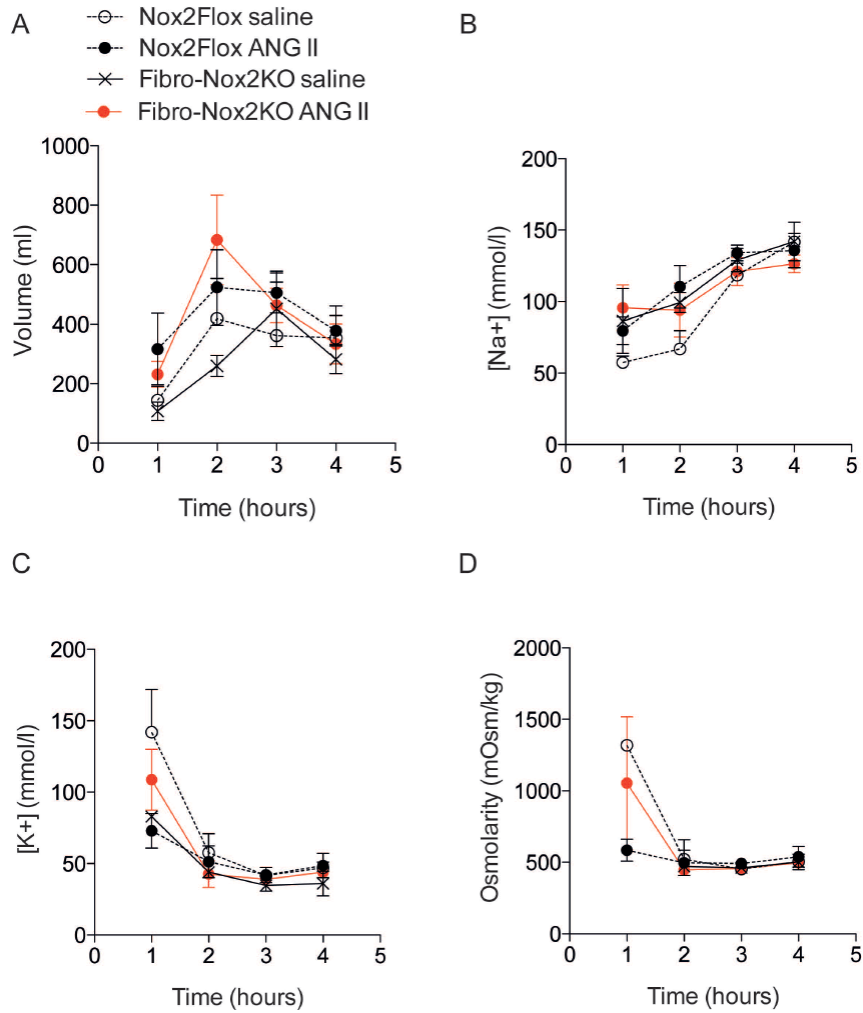

**Supplemental Fig. IV. Effect of fibroblast-specific Nox2 deletion on renal function.**

Following an intraperitoneal injection of PBS, urine was analysed for (A) volume, (B) sodium concentration, (C) potassium concentration, and (D) osmolarity. n=3/group.

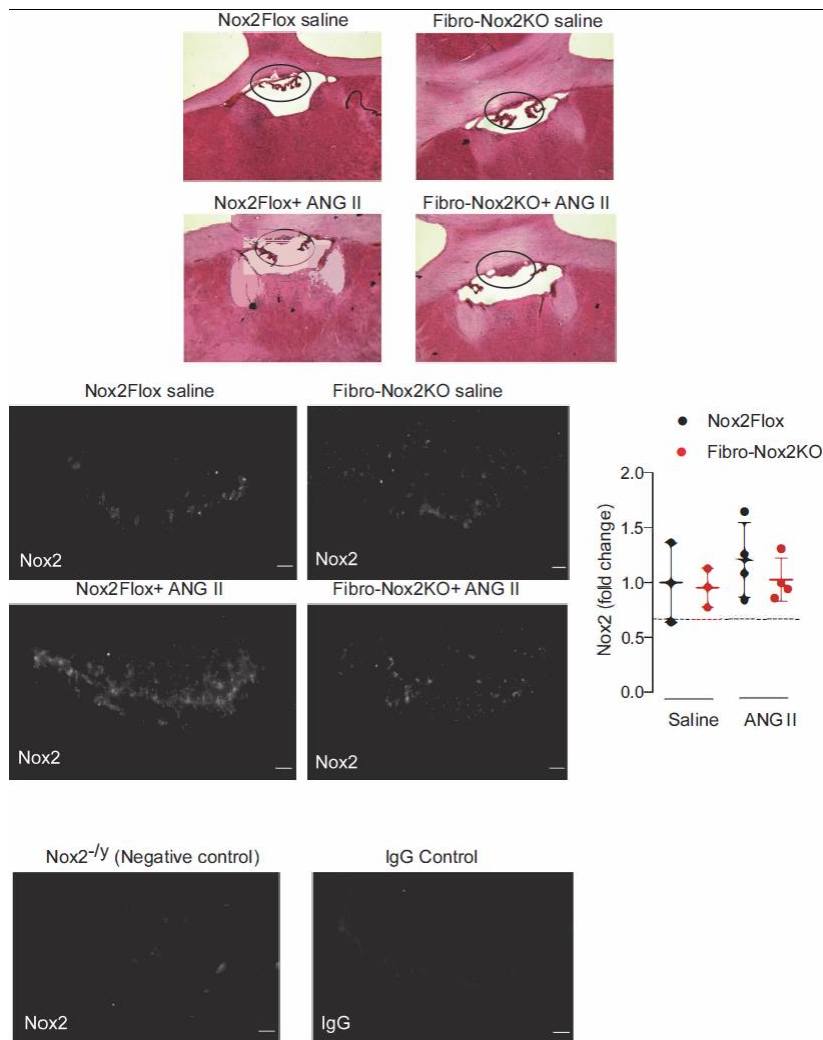

**Supplemental Fig. V. Nox2 protein levels in subfornical organ of the Fibro-Nox2KO mouse brain.** Fibro-Nox2KO and Nox2Flox mice were treated for 14 days with ANG II infusion or saline and the brain was sectioned. The top 4 panels show brain sections stained with H&E; the subfornical organ (SFO) is indicated by the area circled in black. Immunofluorescence for Nox2 protein in the SFO was assessed using a Nox2 Ab. Brain sections from Nox2<sup>-/-</sup> (global KO) and Nox2Flox mice treated with ANG II were incubated with IgG instead of Nox2Ab as negative controls. Scale bars: 20  $\mu$ m. The fold change in mean fluorescence intensity is shown on the right. Dashed line represents the mean signal in Nox2<sup>-/-</sup> mice relative to Nox2Flox mice.

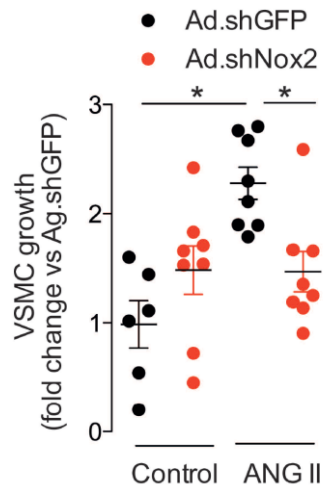

**Supplemental Fig. VI. Effect of conditioned medium of aortic fibroblasts stimulated with ANG II on DNA synthesis of VSMC.** DNA synthesis was assessed by Ki67 staining. n=6-8/group. \*P<0.05; One-way ANOVA followed by Tukey post-test.

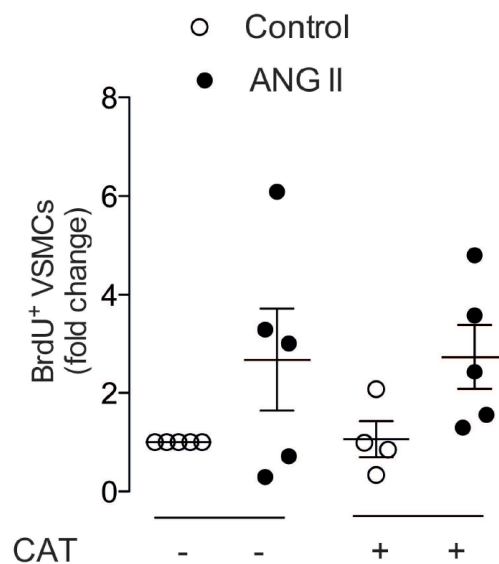

**Supplemental Fig. VII. Effect of catalase treatment of fibroblast-conditioned medium.** Catalase treatment does not inhibit the effect of cardiac fibroblast-conditioned medium on VSMC growth (assessed by BrdU incorporation). n=4-5/group.



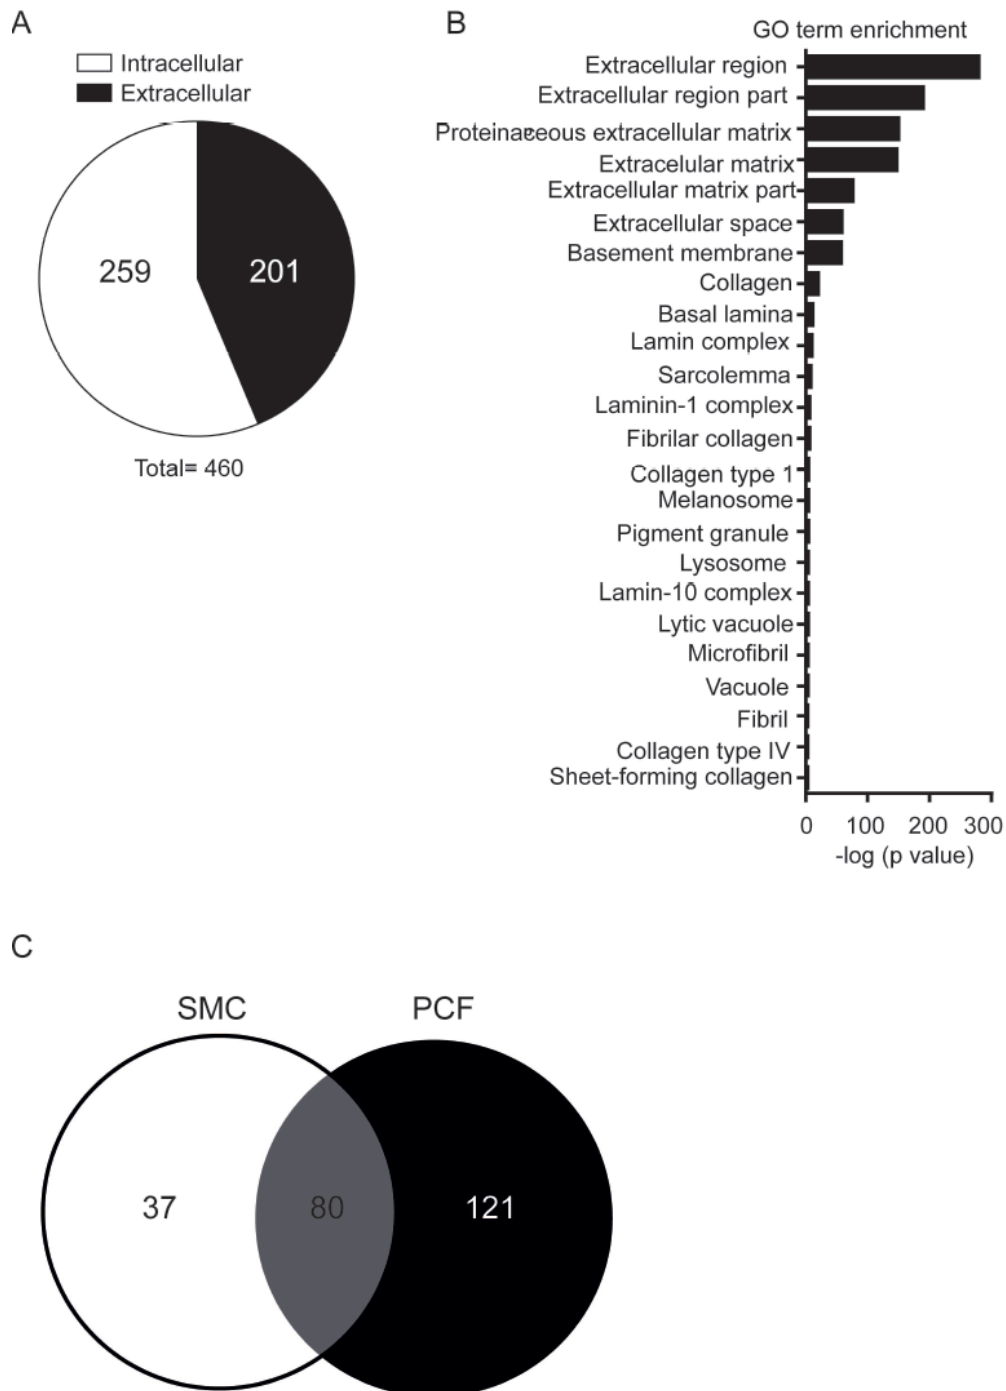

**Supplemental Fig. VIII. Proteomic analyses of the conditioned medium of primary cardiac fibroblasts.** (A) Proportions of intracellular versus extracellular proteins identified in all samples. (B) Gene ontology (GO) term enrichment to identify putative extracellular or secreted proteins. (C) Extracellular/secreted proteins identified in the fibroblast conditioned medium (PCF) that are distinct from those found in the mouse VSMC secretome (SMC).

| Accession Number | Accession Number | Accession Number | Accession Number |
|------------------|------------------|------------------|------------------|
| LAMA4_MOUSE      | LYZ2_MOUSE       | APOE_MOUSE       | LKHA4_MOUSE      |
| LAMB2_MOUSE      | TETN_MOUSE       | CBPQ_MOUSE       | TCPZ_MOUSE       |
| LAMA2_MOUSE      | AK1A1_MOUSE      | MFAP4_MOUSE      | KCY_MOUSE        |
| CO5A1_MOUSE      | ATS2_MOUSE       | SEM3D_MOUSE      | DPEP1_MOUSE      |
| LUM_MOUSE        | CS1B_MOUSE       | K1199_MOUSE      | DOPD_MOUSE       |
| POSTN_MOUSE      | COMP_MOUSE       | CFAB_MOUSE       | TOIP1_MOUSE      |
| CO8A1_MOUSE      | ATL2_MOUSE       | RLA2_MOUSE       | SFRP1_MOUSE      |
| CTGF_MOUSE       | GDN_MOUSE        | CXCL5_MOUSE      | MGP_MOUSE        |
| CATD_MOUSE       | LOXL2_MOUSE      | DKK3_MOUSE       | MA2B2_MOUSE      |
| TRFE_MOUSE       | SFRP3_MOUSE      | OAF_MOUSE        | INHBA_MOUSE      |
| ELN_MOUSE        | PRDX2_MOUSE      | ATS5_MOUSE       | BGH3_MOUSE       |
| SPA3N_MOUSE      | FRIL1_MOUSE      | GGH_MOUSE        | SEM3C_MOUSE      |
| TPM1_MOUSE       | MFAP5_MOUSE      | IQGA1_MOUSE      | LBP_MOUSE        |
| MMP12_MOUSE      | SRPX2_MOUSE      | QPCT_MOUSE       | NGAL_MOUSE       |
| LOXL1_MOUSE      | PROS_MOUSE       | CCL7_MOUSE       | LGUL_MOUSE       |
| FBLN1_MOUSE      | EF1G_MOUSE       | LYZ1_MOUSE       | PEPD_MOUSE       |
| HPT_MOUSE        | MFGM_MOUSE       | HEG1_MOUSE       | TFPI1_MOUSE      |
| TCO2_MOUSE       | ANXA5_MOUSE      | TPIS_MOUSE       | GILT_MOUSE       |
| COEA1_MOUSE      | ISLR_MOUSE       | PLTP_MOUSE       | ADML_MOUSE       |
| CERU_MOUSE       | APOD_MOUSE       | NEUS_MOUSE       | RISC_MOUSE       |
| TKT_MOUSE        | VEGFD_MOUSE      | CREG1_MOUSE      | PLAC9_MOUSE      |
| CO4B_MOUSE       | COFA1_MOUSE      | EPDR1_MOUSE      | GROA_MOUSE       |
| WISP2_MOUSE      | PRELP_MOUSE      | NUCB2_MOUSE      | ALBU_MOUSE       |
| FBLN3_MOUSE      | SRCRL_MOUSE      | XDH_MOUSE        | ANGL2_MOUSE      |
| DERM_MOUSE       | CCL2_MOUSE       | SPON2_MOUSE      | SLIT2_MOUSE      |
| SFRP2_MOUSE      | ITGBL_MOUSE      | BTD_MOUSE        | ASM3A_MOUSE      |
| TAGL2_MOUSE      | ATS1_MOUSE       | DIAC_MOUSE       | HTRA1_MOUSE      |
| IBP2_MOUSE       | FRIH_MOUSE       | COGA1_MOUSE      | CPXM1_MOUSE      |
| OLFL3_MOUSE      | SPRL1_MOUSE      | GDF6_MOUSE       | OSTP_MOUSE       |
| SH3L1_MOUSE      | LTBP2_MOUSE      | PRS23_MOUSE      | IBP5_MOUSE       |

**Supplemental Fig. IX. Proteomic analyses of the conditioned medium of cardiac fibroblasts.** Gene ontology (GO) enrichment analysis of 121 fibroblast-specific secreted proteins to identify putative growth factors (highlighted).

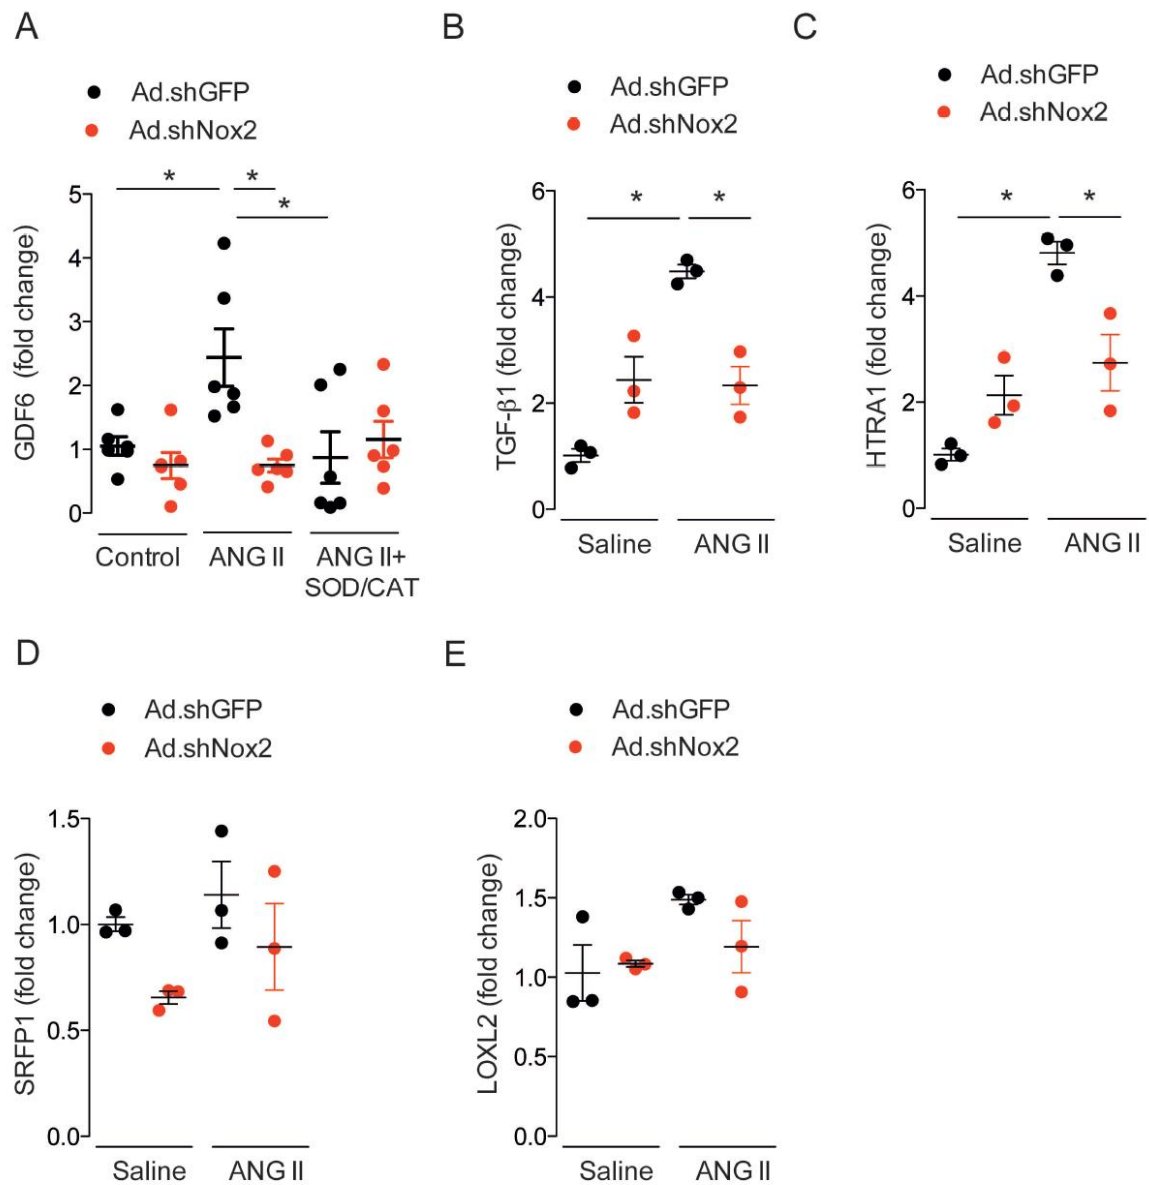

**Supplemental Fig. X. Effect of ANG II on mRNA expression of putative fibroblast growth factors.** GDF6, TGF- $\beta$ 1, HTRA1, SRFP1 and LOXL2 mRNA were quantified in Nox2-deficient (Ad-shNox2) and control cardiac fibroblasts (Ad-shGFP). Some cells were pre-incubated with PEG-SOD plus PEG-CAT before stimulation with ANG II. \* $P < 0.05$ ; Kruskal-Wallis followed by Dunn's post-test.

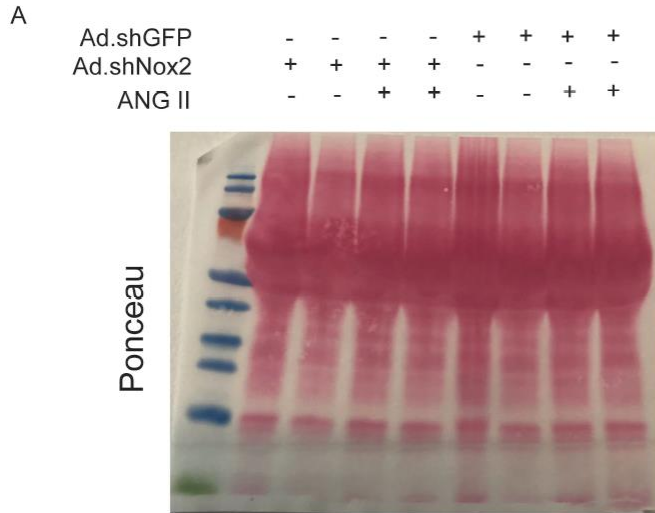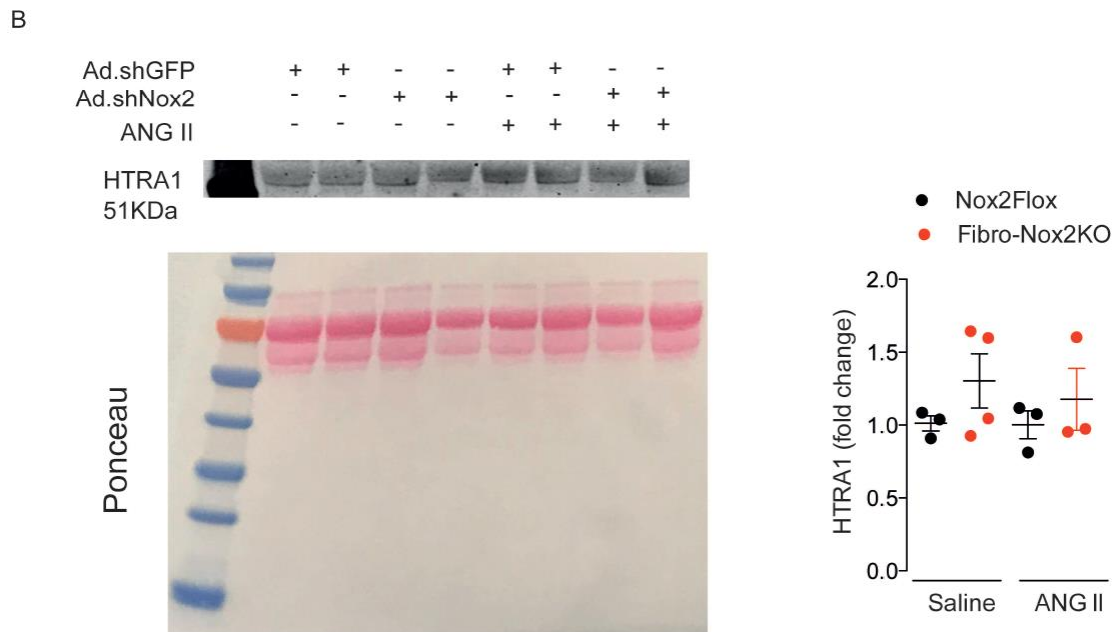

**Supplementary Fig. XI. HTRA1 protein levels in fibroblast-conditioned medium.** A. Ponceau staining of the membrane used in GDF6 immunoblot in Figure 5A. B. HTRA1 levels in conditioned medium of primary cardiac fibroblasts infected with Ad.shNox2 or Ad.shGFP (control) and treated with ANG II. Representative immunoblot and Ponceau stained membrane are shown to the left and mean data to the right; n=3/group.

Standard curve

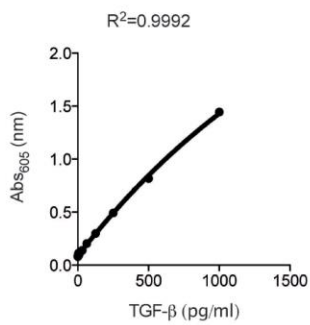

|                 | Abs 605nm (mean± SD) |
|-----------------|----------------------|
| Ad.GFP          | 0.05± 0.003          |
| Ad.GFP+ ANG II  | 0.06± 0.001          |
| Ad.NoX2         | 0.06± 0.006          |
| Ad.NoX2+ ANG II | 0.05± 0.002          |

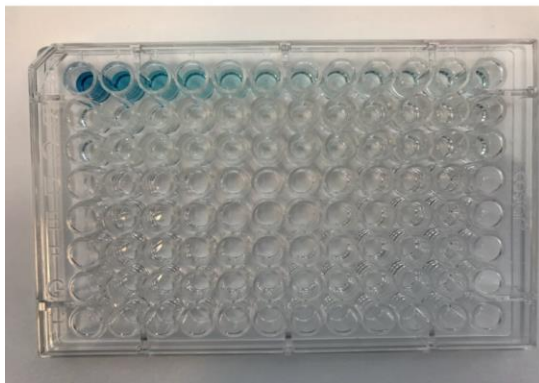

|   | 1 | 2 | 3 | 4 | 5 | 6 | 7 | 8 | 9 | 10 | 11 | 12 |
|---|---|---|---|---|---|---|---|---|---|----|----|----|
| A |   |   |   |   |   |   |   |   |   |    |    |    |
| B |   |   |   |   |   |   |   |   |   |    |    |    |
| C |   |   |   |   |   |   |   |   |   |    |    |    |
|   |   |   |   |   |   |   |   |   |   |    |    |    |
|   |   |   |   |   |   |   |   |   |   |    |    |    |
|   |   |   |   |   |   |   |   |   |   |    |    |    |
|   |   |   |   |   |   |   |   |   |   |    |    |    |
|   |   |   |   |   |   |   |   |   |   |    |    |    |
|   |   |   |   |   |   |   |   |   |   |    |    |    |

A1-12 Standard curve  
 B1-4 Ad.GFP  
 B5-12 Ad.GFP+ ANG II  
 C1-4 Ad.NoX2  
 C5-12 Ad.NoX2+ ANG II

**Supplementary Fig. XII. ELISA for TGFβ in fibroblast-conditioned medium.** Top left panel shows the standard curve for the assay. Top right are the results of the assay. The image and schematic at the bottom show the layout of samples on the ELISA plate. Cardiac fibroblasts were infected with Ad.shNox2 or Ad.shGFP (control) and treated with ANG II. n=3/group.

A Expanded blot Figure 1B

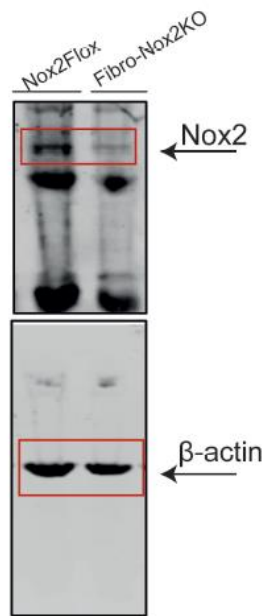

B Expanded blot Figure 4C

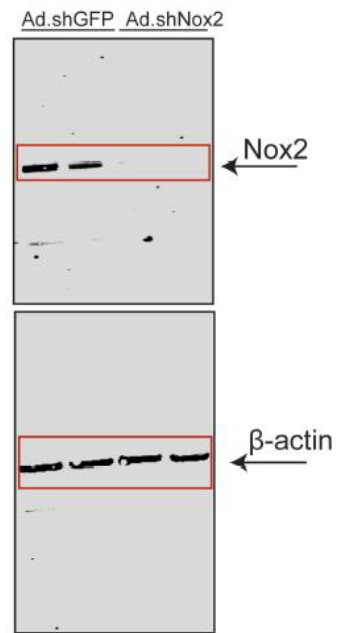

C Expanded blot Figure 5A

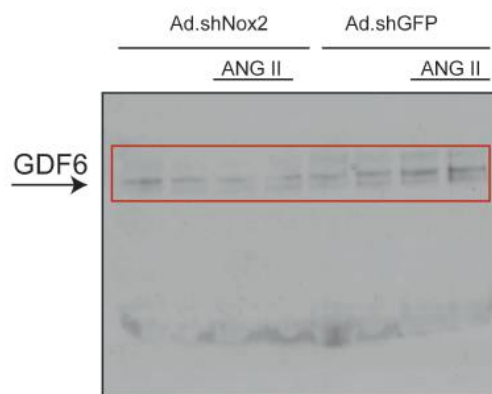

D Expanded blot Figure 5B

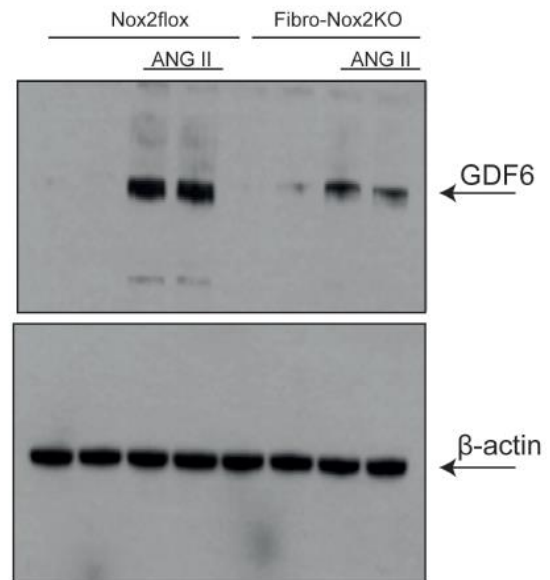

E Expanded blot Figure 6B

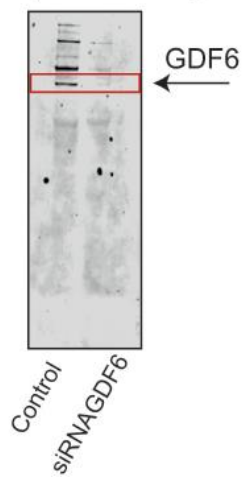

**Complete source blots.** Source blots relate to the figures indicated in the panel headings.

## Major Resources Table

In order to allow validation and replication of experiments, all essential research materials listed in the Methods should be included in the Major Resources Table below. Authors are encouraged to use public repositories for protocols, data, code, and other materials and provide persistent identifiers and/or links to repositories when available. Authors may add or delete rows as needed.

### Animals (in vivo studies)

| Species          | Vendor or Source | Background Strain | Sex | Persistent ID / URL |
|------------------|------------------|-------------------|-----|---------------------|
| Nox2flox         | Local KCL BSU    | C57BL/6J          | M   |                     |
| FibroNox2KO      | Local KCL BSU    | C57BL/6J          | M   |                     |
| Cre-Td+Nox2fl/fl | Local KCL BSU    | C57BL/6J          | M   |                     |
| Nox2y/-          | Local KCL BSU    | C57BL/6J          | M   |                     |

### Genetically Modified Animals

|                 | Species               | Vendor or Source | Background Strain | Other Information | Persistent ID / URL |
|-----------------|-----------------------|------------------|-------------------|-------------------|---------------------|
| Parent - Male   | <i>Col1a2CreER-Tg</i> | Local KCL BSU    | C57BL/6J          |                   |                     |
| Parent - Female | Nox2flox              | Local KCL BSU    | C57BL/6J          |                   |                     |

### Antibodies

| Target antigen            | Vendor or Source | Catalog #  | Working concentration                 | Lot # (preferred but not required) | Persistent ID / URL                                                                                     |
|---------------------------|------------------|------------|---------------------------------------|------------------------------------|---------------------------------------------------------------------------------------------------------|
| Nox2                      | BD Biosciences   | 611415     | 2.5µg/ml for IF and 0.25 µg/ml for WB |                                    |                                                                                                         |
| GDF6                      | Abcam            | ab73288    | 10µg/ml for IF and 1µg/ml for WB      |                                    |                                                                                                         |
| HTRA1                     | Abcam            | ab36611    | 2µg/ml                                |                                    |                                                                                                         |
| Alpha-smooth muscle actin | Abcam            | A2447      | 4µg/ml                                |                                    |                                                                                                         |
| Ki67                      | Novus Biological | NB-6001252 | 0.5µL (1:200)                         | 1030                               | <a href="https://www.novusbio.com/PDFs/NB600-1252.pdf">https://www.novusbio.com/PDFs/NB600-1252.pdf</a> |
| Vimentin                  | Abcam            | ab8069     | 4µg/ml                                |                                    |                                                                                                         |
| Beta-actin                | Sigma            | a2228      | 0.67µg/ml                             |                                    |                                                                                                         |
| VE-cadherin               | Biolegend        | 138002     | 10µg/ml                               |                                    |                                                                                                         |
| BrDU                      | Abcam            | ab152095   | 10µg/ml                               |                                    |                                                                                                         |

### DNA/cDNA Clones

| Clone Name | Sequence | Source / Repository | Persistent ID / URL |
|------------|----------|---------------------|---------------------|
|            |          |                     |                     |
|            |          |                     |                     |
|            |          |                     |                     |

### Cultured Cells

| Name                             | Vendor or Source               | Sex (F, M, or unknown) | Persistent ID / URL                                                                                                                                                                                               |
|----------------------------------|--------------------------------|------------------------|-------------------------------------------------------------------------------------------------------------------------------------------------------------------------------------------------------------------|
| C57Bl/6 mouse primary fibroblast | Cell Biologics (Cat. C57-6075) | Unknown                | <a href="https://www.cellbiologics.net/document/datasheet/Mouse/WT-MS/C57-cells-DONE/C57%20FB/C57-6075.pdf">https://www.cellbiologics.net/document/datasheet/Mouse/WT-MS/C57-cells-DONE/C57%20FB/C57-6075.pdf</a> |
|                                  |                                |                        |                                                                                                                                                                                                                   |
|                                  |                                |                        |                                                                                                                                                                                                                   |

**Data & Code Availability**

| Description | Source / Repository | Persistent ID / URL |
|-------------|---------------------|---------------------|
|             |                     |                     |
|             |                     |                     |
|             |                     |                     |

**Other**

| Description | Source / Repository | Persistent ID / URL |
|-------------|---------------------|---------------------|
|             |                     |                     |
|             |                     |                     |
|             |                     |                     |
